# Supplementary material for: Procymidone Application Contributes to Multidrug Resistance of Botrytis cinerea
Source: MDPI journal article supplement (doi:10.3390/jof10040261), 2024-03-29
Supplement: s1 [file s1]

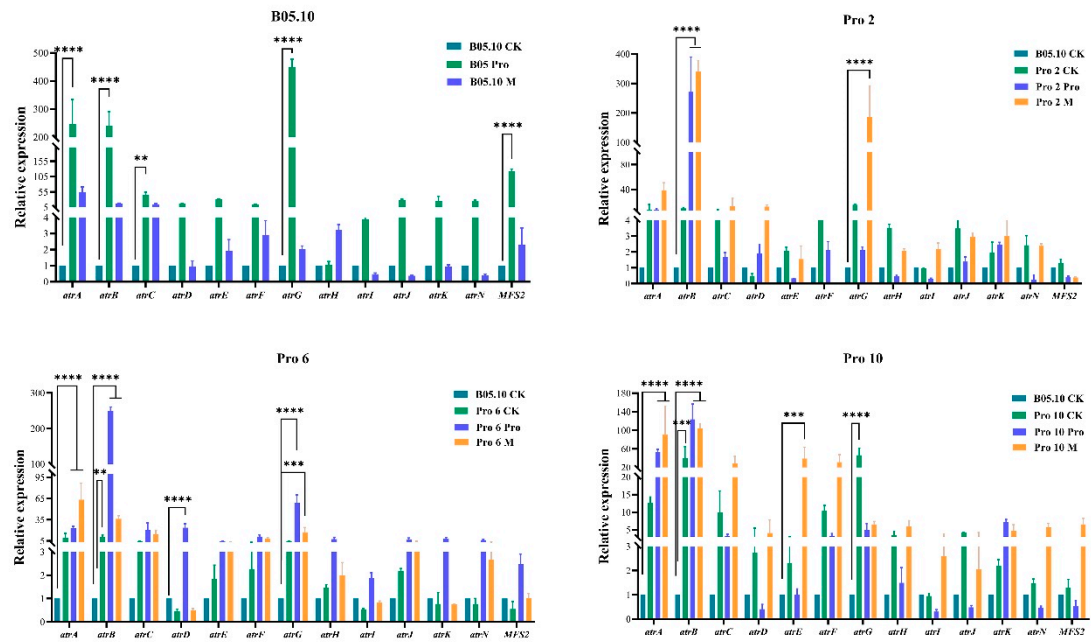

**Supplement Figure S1.** Quantitative polymerase chain reaction (qPCR) analysis of 14 ABC transporter genes in procymidone-resistant mutants with *BcEF* being a reference gene. CK: non-treated; Pro: procymidone added; M: azoxystrobin added; '\*\*\*\*' indicates  $p$  value < 0.0001; '\*\*\*' indicates  $p$  value < 0.001; '\*\*' indicates  $p$  value < 0.01; '\*' indicates  $p$  value < 0.05.

**Supplement Table S1.** Primers used for sequence analysis.

| Genes         | Sequences                                                                        |
|---------------|----------------------------------------------------------------------------------|
| <i>BcBos1</i> | F: ACATCACAATGTCGACATGGCAGCCATTGAGCCTG<br>R: CCTTGCCCATTCTAGATTGAGCCCCCTTGGTCTTC |
| <i>SdhA</i>   | F: ATTTCTACACAATGTCTTCATTTC<br>R: ATCATACTAATCCGCTCC                             |
| <i>SdhB</i>   | F: ACCTACTCGCCCTATCCAAT<br>R: AGACTTAGCAATAACCGCCC                               |
| <i>SdhC</i>   | F: GCCAGATTTCTTAGTCAG<br>R: GCTGGACTCTGAATGTGAT                                  |
| <i>SdhD</i>   | F: AGCCAATCAAATCCGTTCCG<br>R: CAAACTCCTCCCTGCCCTCT                               |
| <i>Cytb</i>   | F: TAAAGTGGTATAACCCGACGG<br>R: CCATCTCCATCCACCATACCT                             |
| <i>Mrr1</i>   | F: CCAATCATTCCTCAATCATTCA<br>R: GGATAGGGTATTGCGTAGATCG                           |

F: forward primer. R: reverse primer.
